# Supplementary material
Source: PubMed Central journal article supplement (PMC7282904)

# Figure S1. The Developmental Programming of Mitochondrial Biology Hypothesis: a conceptual framework.

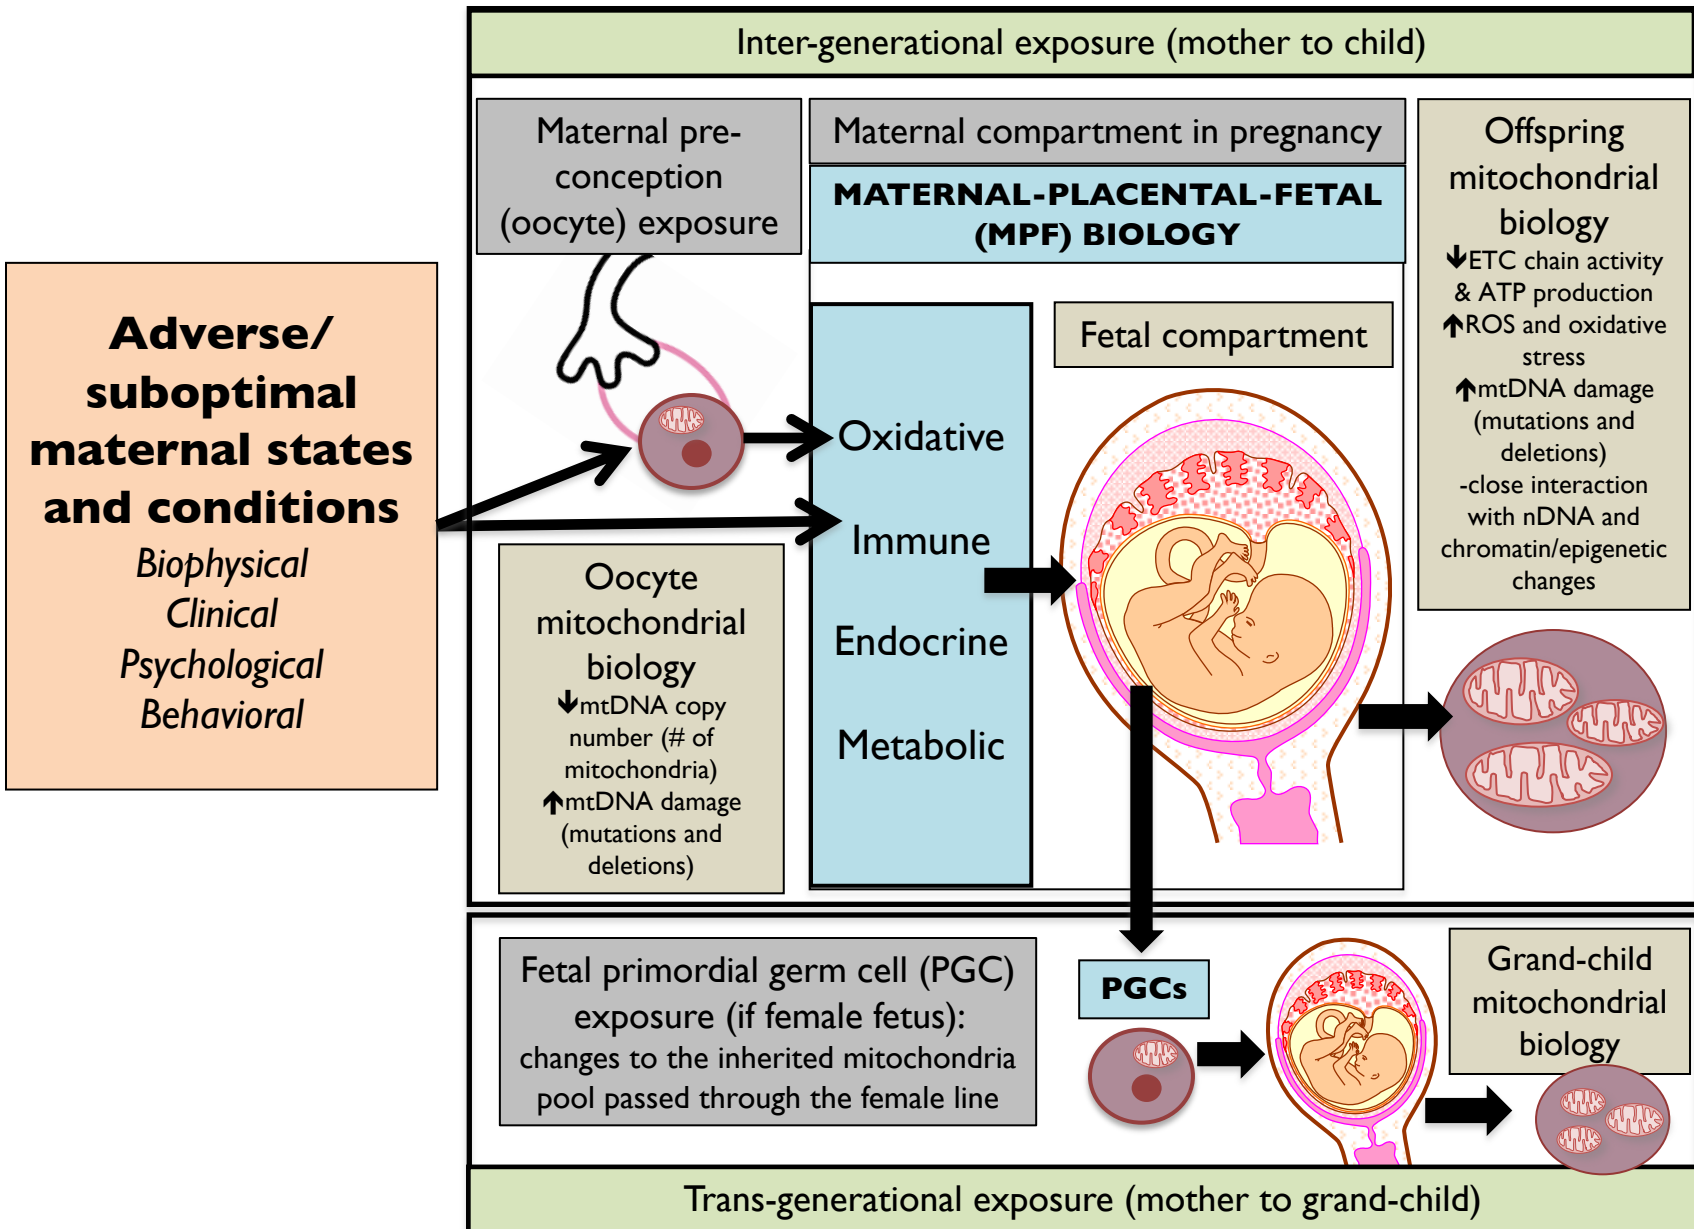

Supplement: rspb20192713supp1.pdf [file rspb20192713supp1.pdf]
