# Supplementary material
Source: PubMed Central journal article supplement (PMC7282904)
Supplement: rspb20192713supp2.pdf [file rspb20192713supp2.pdf]

**Supplemental Table S1: Suboptimal gestational exposures and mitochondrial biology: animal studies**

| Authors                                   | Animal model | Age at assessment                                                      | Gestational exposure(s)                                                                                                                                                                                                                  | Cell/tissue type                                         | Mitochondrial biology outcomes                                                                                                                                                                                                                                                                                                                                                                                                                            |
|-------------------------------------------|--------------|------------------------------------------------------------------------|------------------------------------------------------------------------------------------------------------------------------------------------------------------------------------------------------------------------------------------|----------------------------------------------------------|-----------------------------------------------------------------------------------------------------------------------------------------------------------------------------------------------------------------------------------------------------------------------------------------------------------------------------------------------------------------------------------------------------------------------------------------------------------|
| Igosheva N. et al. 2010 <sup>61</sup>     | Mouse        | Zygote (PC1)                                                           | Pre-gestational, conception and early embryonic exposure to obesity induced by HF/HS obesogenic diet                                                                                                                                     | Pre-implantation zygote                                  | no Δ in mitochondrial content (mtDNAcn +TFAM, NRF1 gene expression (GE) indicators of biogenesis)<br>↑mitochondrial membrane potential<br>↑ROS (measured by dihydroethidium (HET) fluorescence)                                                                                                                                                                                                                                                           |
| Wu L.L. et al. 2015 <sup>62</sup>         | Mouse        | Blastocyst (PC5) + Fetal (GD14.5)                                      | Pre-gestational exposure to obesity: Oocytes taken from polygenic obese mice ('Blobby' strain, which overeat and develop severe obesity on standard low-fat mouse chow) and fertilized via IVF - transplanted to lean mice for gestation | Pre-implantation blastocyst + Fetal liver, kidney, heart | ↓ mitochondrial content (mtDNAcn), in blastocyst, and fetal liver and kidney tissue<br>↑ mtDNA damage (e.g. deletions) in liver                                                                                                                                                                                                                                                                                                                           |
| Shankar K. et al. 2011 <sup>63</sup>      | Rat          | Blastocyst (PC4.5)                                                     | Pre-gestational, conception and early embryonic exposure to obesity: Maternal obesity induced through enteric overfeeding prior to conception                                                                                            | Pre-implantation blastocyst                              | ↓mitochondrial GE (69 transcripts, including TFAM & NRF1- indicate ↓mito content)                                                                                                                                                                                                                                                                                                                                                                         |
| Andreas E. et al. 2019 <sup>44</sup>      | Mouse        | Blastocyst (PC4) + post-natal PND70 (see <sup>4</sup> for F2, F3 data) | Pre- and gestational exposure to obesity: Maternal obesity induced by HF/HS- IVF fertilization for blastocyst analysis and standard mating for F1 post-natal oocyte analysis                                                             | Pre-implantation blastocyst + Post-natal oocyte          | Blastocyst: ↓ mitochondrial content (mitotracker red and CS), ↓ATP, ↑mitochondrial membrane potential, ↑ nDNA methylation (lysine-9-methylated histone H3 (H3K9me2))<br>F1 post-natal oocyte: ↓ mitochondrial content (mitotracker red and CS), ↓ATP, ↑ nDNA methylation(5- methyl-cytosine (5mC))                                                                                                                                                        |
| McPherson N.O. et al 2015 <sup>64</sup>   | Mouse        | Fetal (GD18) + placenta                                                | Pre-gestational and conception exposure to obesity: Maternal obesity induced via HFD- transplanted to lean mice for gestation                                                                                                            | Fetal liver + placenta                                   | ↓ mitochondrial content (mtDNAcn) in liver<br>↓mitochondrial content (proxy GE measure- NRF1- didn't measure mtDNAcn) in placenta                                                                                                                                                                                                                                                                                                                         |
| Peterside I.E. et al 2003 <sup>48</sup>   | Rat          | Fetal (GD21) + post-natal (PND1, 14 & 28)                              | Gestational exposure IUGR: Uteroplacental insufficiency at GD19 induced by surgical uterine arterial ligation                                                                                                                            | Fetal and post-natal liver                               | ↑mitochondrial content (mitochondrial protein) at fetal, PND1 & 14, but no change at day28<br>↑OXPHOS substrate oxidation in fetal +PND1, but ↓OXPHOS in PND14 &28<br>↑ ROS at all time points (ROS product, measured by HNE-modified protein)                                                                                                                                                                                                            |
| Simmons R.A. et al 2003 <sup>59</sup>     | Rat          | Fetal (GD21) + post-natal (PND7, 49 & 105)                             | Gestational exposure IUGR: Uteroplacental insufficiency at GD18 induced by surgical uterine arterial ligation. Pups fostered on normal unoperated female rats until weaned.                                                              | Fetal and post-natal pancreatic islet cells              | ↑mitochondrial content (mtDNAcn) in fetus, but ↓mtDNAcn by day105<br>↓ATP production (all time points, further decrease post-natal)<br>↓ Complex I and III activity (all time points)<br>no Δ in Complex II, IV + CS activity (except ↓CS at day105)<br>↑ mtDNA mutations (only day49+105) ↓mitochondrial GE (all time points)<br>↑ ROS at all time points (measured by H <sub>2</sub> DCFDA fluorescence + oxidative stress/ROS product measured by HNE) |
| Jones A.K. et al 2019 <sup>58</sup>       | Sheep        | Fetal (~125 GD)                                                        | Gestational exposure to IUGR: IUGR created by exposing pregnant ewes to elevated humidity and temperature (40°C for 12h, 35°C for 12h) from ~37 GD to 112~116 GD. In-vivo experiments (liver biopsy)                                     | Fetal liver                                              | Altered mitochondrial nDNA encoded GE<br>↓mitochondrial metabolic intermediates (acetate, citrate, & succinate- suggesting<br>↓OXPHOS)                                                                                                                                                                                                                                                                                                                    |
| McCurdy C.E. et al 2016 <sup>53</sup>     | Primate      | Fetal (GD130)                                                          | Pre- and gestational exposure to HFD and/or obesity                                                                                                                                                                                      | Fetal skeletal muscle                                    | ↓mitochondrial content (mtDNAcn + CS)<br>↑OXPHOS ETC activity (complex I and IV)<br>↓ OXPHOS capacity & efficiency<br>↑ROS (ROS product (lipid peroxidation), measured by TBARS & HNE- modified protein)                                                                                                                                                                                                                                                  |
| Mayeur S. et al 2013 <sup>57</sup>        | Rat          | Placenta (at full term birth-PC21)                                     | Gestational exposure IUGR: Maternal caloric restriction (70% food-restricted) from PC0-PC21                                                                                                                                              | Placenta                                                 | ↑mtDNA content (mtDNAcn +GE indicators PGC-1α, TFAM & NRF1)<br>Altered mtDNA GE: ↓(MT-COX1 (complex IV), MT-ATP6 (complex V); ↑ (MT-COX2 (complex IV))<br>↑mitochondrial inefficiency: ↑OXPHOS (O <sub>2</sub> consumption: max, basal, RCR)) but ↓ATP production                                                                                                                                                                                         |
| Borengasser S.J. et al 2014 <sup>54</sup> | Rat          | Placenta + Post-natal (PND35 &130)                                     | Pre- and gestational exposure to obesity: Maternal obesity induced through enteric overfeeding prior to conception with ad libitum feeding during gestation-offspring cross-fostered to lean dams after birth                            | Placenta & post-natal liver, skeletal muscle             | no Δ to mitochondrial content (mtDNAcn)<br>↓mitochondrial GE (regulators of mitochondrial dynamics- varied by tissue)                                                                                                                                                                                                                                                                                                                                     |
| Mdaki K.S. et al. 2016 <sup>55</sup>      | Rat          | At birth (PC-22)                                                       | Pregestational exposure to obesity (HF) and gestational exposure to diabetes (DM): Maternal obesity was induced                                                                                                                          | Post-natal cardiac muscle                                | Altered mitochondrial content (mtDNAcn):↑HF exposed, but ↓DM exposed                                                                                                                                                                                                                                                                                                                                                                                      |

|                                            |       |                                                       |                                                                                                                                                                                                               |                                                        |                                                                                                                                                                                                                                                                                                                          |
|--------------------------------------------|-------|-------------------------------------------------------|---------------------------------------------------------------------------------------------------------------------------------------------------------------------------------------------------------------|--------------------------------------------------------|--------------------------------------------------------------------------------------------------------------------------------------------------------------------------------------------------------------------------------------------------------------------------------------------------------------------------|
|                                            |       |                                                       | through HF >28 days prior to breeding, and on GD14 maternal diabetes was induced by maternal streptozotocin injection. (4 groups: HF, DM, HF+DM, vs control)                                                  |                                                        | <p>↓OXPHOS (all OCR measures: basal, spare, maximum, ATP-linked and proton leak) and ↓FAO in DM exposed and DM+HF exposed (lowest in DM+HF)</p> <p>↓mitochondrial membrane potential and ↑fission (mito-tracker green) in DM+HF exposed</p>                                                                              |
| Bruin J.E. et al. 2008 <sup>47</sup>       | Rat   | Post-natal (PND21-28, 105 & 182)                      | Pre- and gestational exposure to nicotine: Maternal nicotine bitartrate via subcutaneous injection for 2 weeks prior to mating until weaning                                                                  | Post-natal pancreas                                    | <p>no Δ in mitochondrial content (mitochondrial#/beta cell mass or CS) at any time point</p> <p>↓OXPHOS ETC complex IV activity at PND182 (no difference before)</p> <p>↑ROS/oxidative stress (measured by H<sub>2</sub>DCFDA fluorescence + ROS product, measured by OxyBlot), only measured at PND182</p>              |
| Borengasser S.J. et al 2011 <sup>66</sup>  | Rat   | Post-natal (PND21)                                    | Pre- and gestational exposure to obesity: Maternal obesity induced through enteric overfeeding prior to conception with ad libitum feeding during gestation-offspring cross-fostered to lean dams after birth | Post-natal liver                                       | <p>no Δ in mito content (GE indicator- TFAM)</p> <p>↓mitochondrial fatty acid oxidation (GE of PGC-1α)</p> <p>↓OXPHOS ETC complex protein (II, III and V)</p>                                                                                                                                                            |
| Ferreira D.J.S. et al 2016 <sup>60</sup>   | Rat   | Post-natal (PND22)                                    | Gestational exposure to dietary protein restriction: Maternal ad libitum diet of low-protein (8%) post-conception                                                                                             | Post-natal brainstem                                   | <p>↓mitochondrial content (citrate synthase (CS))</p> <p>↑basal OXPHOS respiration but ↓RCR</p> <p>↑ROS/oxidative stress (measured by H<sub>2</sub>DCFDA fluorescence + ROS product, measured by protein carbonyls)</p>                                                                                                  |
| McMurray F. et al 2019 <sup>67</sup>       | Mouse | Post-natal (PND~30 & ~90)                             | Pre- and gestational exposure to obesity: Maternal obesity induced via HF/HS diet                                                                                                                             | Post-natal skeletal muscle (white & red gastrocnemius) | <p>↑proton-leak respiration (30&amp;90PND in white muscle, only 30D in red muscle)</p> <p>↓ROS production induced by FAO (measured by Amplex Ultra Red fluorescence) in red muscle 90PND, no Δ in white</p> <p>↓mitoflash activity (indicator of mito metabolism) at 90PND</p>                                           |
| Saben J.L. et al 2016 <sup>65</sup>        | Mouse | Post-natal (PND56) (see <sup>17</sup> for F2 F3 data) | Pre- and gestational exposure to obesity: Maternal obesity induced by HF/HS diet                                                                                                                              | Post-natal skeletal muscle & oocyte                    | <p>↓mitochondrial content (mtDNAcn) (in the oocyte)</p> <p>↓beta-oxidation &amp; ↓RCR</p> <p>↓ETC complex activity (II, III and V)</p> <p>↑ROS/oxidative stress (ROS product (lipid peroxidation), measured by TBARS)</p>                                                                                                |
| Alfaradhi M.Z. et al 2014 <sup>49</sup>    | Mouse | Post-natal (PND56)                                    | Pre- and gestational exposure to obesity: Maternal obesity induced by HF/HS diet                                                                                                                              | Post-natal liver                                       | <p>↑mitochondrial content (proxy measure GDH)</p> <p>↑ROS/oxidative stress (ROS products, measured by 8-OH-dG + HNE)</p> <p>↓cytochrome c &amp; ↑ETC complex I &amp; II activity (suggests mitochondrial uncoupling)</p>                                                                                                 |
| Aiken C.E. et al. 2016 <sup>46</sup>       | Mouse | Post-natal (PND84)                                    | Pre- and gestational exposure to obesity: Maternal obesity induced by HF/HS diet (post-natal diet was varied, but had no effect on mitochondrial outcomes)                                                    | Post-natal ovary                                       | <p>↑mitochondrial content (mtDNAcn and Tfam gene expression)</p> <p>↑ROS/oxidative stress (ROS products, measured by gene expression Alox12 &amp; Alox15)</p>                                                                                                                                                            |
| Fetterman J.L. et al 2013 <sup>45</sup>    | Mouse | Post-natal (~PND84)                                   | Gestational exposure to second-hand smoke: Maternal exposure from GD1-19 ( <i>in utero</i> ) vs post-natal 1-21 vs control                                                                                    | Post-natal heart- aorta                                | <p>↑mitochondrial content (mtDNAcn) (both <i>in utero</i> &amp; post natal smoke exposure groups vs control)</p> <p>↑mtDNA damage (# unique deletions) (both)</p> <p>Only ↑mtDNA damage (deletion load) from <i>in utero</i> exposure</p> <p>↑ROS/oxidative stress (measured by aconitase enzymatic activity) (both)</p> |
| de Velasco P.C. et al 2017 <sup>50</sup>   | Mouse | Post-natal (PND110)                                   | Gestational exposure to "poor quality" (trans- and interesterified) dietary fats                                                                                                                              | Post-natal liver                                       | <p>no Δ mitochondrial content (CS)</p> <p>↓OXPHOS max and reserve capacity (respirometry)</p> <p>↑ROS (measured by Amplex Red fluorescence) + electron leakage</p>                                                                                                                                                       |
| Burgueño A.L. et al 2013 <sup>56</sup>     | Rat   | Post-natal (PND245)                                   | Pre-gestational and conception exposure to obesity: Maternal obesity induced via HFD                                                                                                                          | Post-natal liver                                       | <p>↓mitochondrial content (mtDNAcn) but no Δ in GE indicators of content (TFAM, NRF1)</p>                                                                                                                                                                                                                                |
| Tarry-Adkins J.L. et al 2016 <sup>52</sup> | Rat   | Post-natal (PND365)                                   | Gestational exposure to dietary protein restriction: Maternal ad libitum diet of low-protein (8%) post-conception- cross-fostered to control dams PND3                                                        | Post-natal skeletal muscle                             | <p>↓mitochondrial content (CS)</p> <p>↑ETC activity (complex I, II-III, IV)</p> <p>↑ROS/oxidative stress (measured by gene expression, Gp91phox, P22phox)</p>                                                                                                                                                            |

**Supplemental Table S1 Legend:**

\*Table 1 focuses on inter-generational transmission (mother to embryo/child) - see following references <sup>44,65,106,107</sup> for trans-generational specific details and F2, F3 evidence

8-OH-dG= 8-hydroxy-2'-deoxyguanosine (marker of oxidative damage to DNA), no Δ= no change, Amplex Red = Amplex Red® (N-acetyl-3, 7-dihydroxy- phenoxazine) (marker of ROS), ATP= Adenosine Triphosphate, CS=citrate synthase (marker of mitochondrial content), ETC= electron transport chain, FAO= fatty acid oxidation, GD=gestation day, GDH= Glutamate dehydrogenase (a marker of intact mitochondria, proxy for mitochondrial content), GE= gene expression, H<sub>2</sub>DCFDA= 2',7'- dichlorodihydrofluorescein diacetate (marker of ROS), HFD= high fat diet; HF/HS= high fat/high sugar diet; HNE= trans-4-hydroxy-2-nonenal (marker of lipid peroxidation/oxidative stress), IUGR= intra-uterine growth restriction, mtDNAcn= mitochondrial DNA copy number (ratio of mtDNA/nDNA), OXPHOS= oxidative phosphorylation, OxyBlot= OxyBlot™ Protein Oxidation Detection Kit (marker of protein oxidation/oxidative stress), PC=post-conception, PND=post-natal day, RCR=respiratory control ratio (indicator of highly coupled respiration), ROS= reactive oxygen species, TBARS= thiobarbituric acid reactive substance (marker of lipid peroxidation/oxidative stress)

**Supplemental Table S2: Suboptimal gestational exposures and mitochondrial biology: human studies**

| Authors                                    | Age at assessment | Gestational exposure(s)                                                                                                                                                                                                                                                                                         | Offspring cell /tissue type         | Mitochondrial biology outcomes                                                                                                                                                                                                                                                                                                                          |
|--------------------------------------------|-------------------|-----------------------------------------------------------------------------------------------------------------------------------------------------------------------------------------------------------------------------------------------------------------------------------------------------------------|-------------------------------------|---------------------------------------------------------------------------------------------------------------------------------------------------------------------------------------------------------------------------------------------------------------------------------------------------------------------------------------------------------|
| Leary C. et al 2014 <sup>89</sup>          | 3-5 days (PC)     | Pre-gestational Obesity: Comparison of 150 IVF/ICSI surplus embryos from 29 women with a range of pre-gestational BMI                                                                                                                                                                                           | Embryo/ blastocyst stage            | ↓mitochondrial metabolism and impaired substrate oxidation (glucose) in blastocysts from overweight vs normal weight women                                                                                                                                                                                                                              |
| Lassance L. et al 2015 <sup>86</sup>       | 7-12 (GW)         | Gestational Obesity: Comparison from obese (n=18) vs. lean (n=17) woman in the first trimester (voluntary terminations)                                                                                                                                                                                         | Placenta                            | ↓mitochondrial and nuclear encoded mitochondrial gene expression in obese vs lean women                                                                                                                                                                                                                                                                 |
| Janssen B.G. et al 2015 <sup>82</sup>      | At birth          | Gestational air pollution: Calculated maternal PM <sub>2.5</sub> exposure by address in each trimester (n=381 mother/child pairs)                                                                                                                                                                               | Placenta                            | ↓mitochondrial content (mtDNAcn)<br>↑mtDNA methylation (MT-RNR1, D-loop)                                                                                                                                                                                                                                                                                |
| Clemente D.B.P. et al 2016 <sup>77</sup>   | At birth          | Gestational air pollution exposure: Calculated maternal nitrogen dioxide (NO <sub>2</sub> ) across pregnancy (n=336 mother/child pairs)                                                                                                                                                                         | Placenta                            | ↓mitochondrial content (mtDNAcn)                                                                                                                                                                                                                                                                                                                        |
| Clemente D.B.P. et al 2017 <sup>101</sup>  | At birth          | Gestational air pollution exposure: Calculated maternal nitrogen dioxide (NO <sub>2</sub> ) across pregnancy (n=336 mother/child pairs)                                                                                                                                                                         | placenta                            | Follow up study to <sup>77</sup> - Mediation analysis showed that mtDNAcn mediated 5.5% of the inverse association between prenatal NO <sub>2</sub> exposure during trimester 1 and infant height at age 6 months                                                                                                                                       |
| Vriens A. et al 2017 <sup>96</sup>         | At birth          | Gestational environmental pollution exposure: Measured cord blood levels of four perfluoroalkyl compounds and nine organochlorine compounds (n=233 infants)                                                                                                                                                     | Placenta                            | Altered mitochondrial content (mtDNAcn) in association with infant pollution exposure (measured in cord blood): ↓mtDNAcn in association with thallium and ↑ mtDNAcn in association arsenic and β-hexachlorocyclohexane                                                                                                                                  |
| Lattuada D. et al 2008 <sup>88</sup>       | At birth          | Gestational intra-uterine growth restriction (IUGR, n=24) vs uncomplicated pregnancies (n=26)                                                                                                                                                                                                                   | Placenta                            | ↑mitochondrial content (mtDNAcn)                                                                                                                                                                                                                                                                                                                        |
| Mando C. et al 2014 <sup>90</sup>          | At birth          | Gestational preeclampsia (PE, n=6) and IUGR (n=8) vs uncomplicated pregnancies (n=8)                                                                                                                                                                                                                            | Placenta + isolated cytotrophoblast | In IUGR: ↑mitochondrial content (mtDNAcn) placenta but ↓mtDNAcn in cytotrophoblast; ↓mitochondrial gene expression (related to complex II-IV and NRF1 (mito biogenesis)) in cytotrophoblast; ↑OXPHOS/ETC activity (respirometry) in cytotrophoblast<br>In PE: <u>no association</u> with mtDNAcn                                                        |
| Wang Y. and S.W. Walsh 1998 <sup>87</sup>  | At birth          | Gestational PE (n=8) vs uncomplicated pregnancy (n=8)                                                                                                                                                                                                                                                           | Placenta                            | ↑mitochondrial content (mitochondrial protein + CS)<br>↑ROS (ROS product (lipid peroxidation), measured by MDA)                                                                                                                                                                                                                                         |
| Bouhours-Nouet N. et al 2005 <sup>74</sup> | At birth          | Gestational exposure to maternal smoking: Comparison of cigarette smoking (n=19) vs non-smoking (n=19) mothers                                                                                                                                                                                                  | Placenta                            | ↓mitochondrial content (mtDNAcn)<br>↓ETC activity (enzymatic activity complex III)<br><u>No difference</u> in OXPHOS/ETC activity (respirometry)                                                                                                                                                                                                        |
| Mele J. et al 2014 <sup>91</sup>           | At birth          | Gestational exposure to maternal obesity: Comparison of obese (n=26), and overweight women (n=21) versus lean (n=28)                                                                                                                                                                                            | Placenta                            | ↓mitochondrial content (mtDNAcn + CS)<br>↓OXPHOS/ETC function and capacity (ATP levels, complex I-V protein levels, and direct respiratory maximum, basal capacity) in obese vs lean                                                                                                                                                                    |
| Hastie R. and M. Lappas 2014 <sup>81</sup> | At birth          | Gestational exposure to maternal obesity and Type I & Type II DM: Comparison of (i) obese (n= 23) and non-obese (n=19) normal glucose tolerant (NGT) pregnant women; (ii) women with type 1 DM (n=14) and BMI-matched NGT women (n =14); and (iii) women with type 2 DM (n=11) and BMI-matched NGT women (n=11) | Placenta                            | In obese vs non-obese NGT women: ↓mitochondrial content (mtDNAcn); ↓ETC activity (complex III); ↑ROS (measured by ferric-xylol orange)<br>In type I DM vs NGT BMI matched women: ↓ETC activity (complex I, II & III, and III); ↑ROS (measured by ferric-xylol orange assay)<br>In type II DM vs NGT BMI matched women: ↓ETC activity (complex II & III) |
| Lassance L. et al 2015 <sup>87</sup>       | At birth          | Gestational Obesity: Comparison of obese (n=140) versus lean (n=90) women                                                                                                                                                                                                                                       | Placenta                            | <u>No difference</u> in mitochondrial content (CS + mtDNAcn)<br>↓mitochondrial cholesterol concentrations & membrane cholesterol translocator protein & gene expression                                                                                                                                                                                 |
| Lambertini L. et al 2015 <sup>85</sup>     | At birth          | Gestational psychosocial stress and maternal obesity: Measures of maternal psychosocial stress during pregnancy (e.g. Perceived Stress Scale (PSS-14)) and women with range of weights (n=108)                                                                                                                  | Placenta                            | Altered mtDNA gene expression: 1) stress associations: ↑MT-ND2 and ↓MT-ND6 (complex I), ↑MT-CO2 (complex IV); 2) obesity/overweight associations: ↑MT-ND1 and ↓MT-ND6 (complex I), ↑MT-CO2 (complex IV) and ↑MT-ATP6 (complex V)                                                                                                                        |
| Brunst K.J. et al 2017 <sup>75</sup>       | At birth          | Gestational exposure to maternal chronic and current psychosocial stress (n=147)                                                                                                                                                                                                                                | Placenta                            | ↓mitochondrial content (mtDNAcn)                                                                                                                                                                                                                                                                                                                        |
| Janssen B.G. et al 2012 <sup>83</sup>      | At birth          | Gestational air pollution: Calculated maternal PM <sub>10</sub> exposure by address across gestation (stronger association closer to birth); placental tissue (n=174) and fetal cord blood (n=176)                                                                                                              | Placenta + cord blood (buffy coat)  | ↓mitochondrial content (mtDNAcn) (placenta)<br><u>No association</u> with cord blood mtDNAcn                                                                                                                                                                                                                                                            |
| Brunst K.J. et al 2018 <sup>76</sup>       | At birth          | Gestational exposure to air pollution and maternal chronic psychosocial stress: Calculated PM <sub>2.5</sub> exposure by address across pregnancy and stress by the Life Stressor Checklist-Revised (n=167)                                                                                                     | Placenta + cord blood (buffy coat)  | ↓ placental mitochondrial content (mtDNAcn) in association with psychosocial stress<br>↓cord blood mtDNAcn in association with PM <sub>2.5</sub>                                                                                                                                                                                                        |
| Rosa M.J. et al 2017 <sup>94</sup>         | At birth          | Gestational air pollution: Calculated maternal PM <sub>2.5</sub> exposure by address across pregnancy (n=456 mother/child pairs)                                                                                                                                                                                | Cord blood (whole blood+ RBC lysis) | ↓mitochondrial content (mtDNAcn) in association with late pregnancy PM <sub>2.5</sub>                                                                                                                                                                                                                                                                   |

|                                            |                         |                                                                                                                                                                                                                                                                             |                                                                  |                                                                                                                                                                                                                                                                                                                                                                                                                                                                                                     |
|--------------------------------------------|-------------------------|-----------------------------------------------------------------------------------------------------------------------------------------------------------------------------------------------------------------------------------------------------------------------------|------------------------------------------------------------------|-----------------------------------------------------------------------------------------------------------------------------------------------------------------------------------------------------------------------------------------------------------------------------------------------------------------------------------------------------------------------------------------------------------------------------------------------------------------------------------------------------|
| Sanchez-Guerra M. et al 2019 <sup>95</sup> | At birth                | Gestational lead (Pb) exposure: Measured Pb exposure (n=410 mother/child pairs) in maternal blood second and third trimester and at birth in fetal cord blood                                                                                                               | Cord blood (whole blood+ mixed methods)                          | ↑mitochondrial content (mtDNAcn) in association with gestational maternal blood Pb and cord blood Pb levels                                                                                                                                                                                                                                                                                                                                                                                         |
| Xu Y. et al 2019 <sup>98</sup>             | At birth                | Gestational methylmercury (MeHg) and polyunsaturated fatty acids (PUFA) exposure: Measured maternal MeHg and PUFA levels (n=1488) in maternal blood (28 wk) and at birth in fetal cord blood                                                                                | Cord blood (whole blood)                                         | ↓mitochondrial content (mtDNAcn) in association with fetal MeHg cord blood<br><u>No association</u> in mitochondrial content (mtDNAcn) with maternal MeHg or PUFA                                                                                                                                                                                                                                                                                                                                   |
| Grevendonk L. et al 2016 <sup>79</sup>     | At birth                | Gestational air pollution: Calculated maternal PM <sub>2.5</sub> or PM <sub>10</sub> exposure by address across pregnancy (n=293 mother/child pairs)                                                                                                                        | Cord blood (buffy coat)                                          | ↑ROS/oxidative stress (ROS product, measured by 8-OHdG) in cord blood in association with gestational PM <sub>10</sub> exposure                                                                                                                                                                                                                                                                                                                                                                     |
| Novielli C. et al 2017 <sup>92</sup>       | At birth                | Gestational IUGR (n=31), 17 PE/IUGR (n=17) and PE (n=17) vs. 35 term and 8 preterm control                                                                                                                                                                                  | Cord blood (whole blood)                                         | In IUGR, PE/IUGR, and PE vs control:<br>↑mitochondrial content (mtDNAcn)<br>↓mtDNA methylated cytosines (%) in D-loop region                                                                                                                                                                                                                                                                                                                                                                        |
| Reimann B. et al 2019 <sup>93</sup>        | At birth                | Metabolic variation in early life represented by neonatal insulin level (n= 882 with mtDNAcn; n= 176 with mtDNAcn and epigenome data)                                                                                                                                       | Cord blood (buffy coat)                                          | mtDNA content (mtDNAcn) positively correlated with cord blood insulin significant gene expression and epigenome-wide associations with cord blood and mtDNAcn (34 significant DMRs)                                                                                                                                                                                                                                                                                                                 |
| Vriens A. et al 2018 <sup>99</sup>         | At birth                | Metabolic variation in early life represented by neonatal insulin and leptin levels (n=236)                                                                                                                                                                                 | Cord blood (buffy coat)                                          | mtDNA content (mtDNAcn) positively and independently correlated with cord blood insulin and leptin                                                                                                                                                                                                                                                                                                                                                                                                  |
| Breton C.V. et al 2019 <sup>100</sup>      | At birth                | Gestational traffic-related air pollution (TRAP): Calculated TRAP and ambient air pollutant (AAP) exposures, including PM <sub>10</sub> , PM <sub>2.5</sub> , O <sub>3</sub> and NO <sub>2</sub> , by address, BaP-tetrol measured in cord blood (n= 82 mother/child pairs) | Cord blood (buffy coat for mtDNA and plasma for mito peptides)   | Gestational air pollution associated ↑with mito peptides: (TRAP (+) with MOTS-s, PM <sub>10</sub> (+) with HN, BaP-tetrol (+) with SHLP2 and MOTS-c)<br>↑ mtDNA content (mtDNAcn) with BaP-tetrol (no other sig relationships)<br>(+) associations between mito peptides and mtDNA methylation                                                                                                                                                                                                      |
| Costa S.M., et al 2016 <sup>78</sup>       | At birth                | Gestational exposure to maternal obesity: Comparison of overweight/obese (n=24) vs normal weight (n=13)                                                                                                                                                                     | Umbilical vein endothelial cells                                 | Significantly different gene expression pathway analysis in multiple mitochondrial functional and structural genes                                                                                                                                                                                                                                                                                                                                                                                  |
| Boyle K.E. et al 2017 <sup>102</sup>       | At birth                | Gestational exposure to maternal obesity: Comparison of obese (n=14) vs normal weight (n=15)                                                                                                                                                                                | Umbilical cord mesenchymal stem cells (uMSC)                     | ↓ Fatty Acid Oxidation rates<br>No difference in ETC measures (CS enzyme activity or ETC complexes I-IV protein levels)<br>↑ in methylation of FAO related mitochondrial genes (CPT1A) and ETC (Complex II-SDHC) that corresponded with ↓ gene expression                                                                                                                                                                                                                                           |
| Kim J. et al 2015 <sup>84</sup>            | At birth                | Gestational GDM: Contrast between cells lines derived from 4 GDM and 3 control pregnancies                                                                                                                                                                                  | uMSC                                                             | ↓mitochondrial gene expression: mtDNA ETC genes (MT-ND2 (complex 1) and MT-ATP8 (complex V) & nDNA mito. biogenesis (TFAM, PGC-1α)<br>↓OXPHOS/ETC activity (respirometry)<br>↑ROS (measured by DCF-DA and MitoSOX)                                                                                                                                                                                                                                                                                  |
| Baker P.R. et al 2017 <sup>103</sup>       | At birth                | Gestational exposure to maternal obesity: Comparison of obese (OB, n=12) vs normal weight (NW, n=13) or association with neonatal fat mass (%BF) at birth (measured by air displacement plethysmography), or maternal serum FFA levels                                      | uMSCs differentiated to adipocytes and myocytes                  | <u>uMSC myocytes</u> : altered Fatty Acid Oxidation metabolism= incomplete β-oxidation (↑LCAC+ LCOH), with compensatory ↑ω-oxidation and anaplerosis in association with ↑neonatal %BF, but no differences when comparing OB vs NW groups (no change in uMSC adipocytes)<br><u>uMSC adipocytes</u> : altered gene expression indicating ↑OXPHOS/ETC (complexes I-V), but ↑fission and ↓mitochondrial biogenesis and mitophagy in association with ↑neonatal %BF, OB status or maternal FFA exposure |
| Gruzjeva O. et al 2017 <sup>80</sup>       | At birth + 4yrs + 8 yrs | Gestational air pollution: Calculated maternal NO <sub>2</sub> air pollution exposure by address across pregnancy; offspring data in newborns (n=1,508) with subsequent look-up analyses in children 4 (n=733) and 8 (n=786) years                                          | Cord blood + venous blood (4 & 8yr) (whole blood- mixed methods) | ↑newborn DNA methylation in three mitochondria-related genes: cg12283362 (LONP1), cg24172570 (HIBADH), and cg08973675 (SLC25A28)<br>↑4yr+8yr DNA methylation cg08973675 (SLC25A28) (matches one of the genes hypermethylated at birth)                                                                                                                                                                                                                                                              |
| Abraham M. et al 2018 <sup>73</sup>        | 1-3 (PND)               | Gestational exposure to maternal obesity: Comparison of overweight/obese (n=14) vs lean (n=8)                                                                                                                                                                               | Endothelial cells (isolated +cultured fibroblasts)               | ↑mitochondrial inefficiency (respirometry: ↑O <sub>2</sub> consumption but <u>no</u> ↑ATP)<br>↑ROS/oxidative stress (measured by MitoSOX Red + ROS product, measured by protein carbonylation)<br><u>No difference</u> in mitochondrial content (mtDNAcn)                                                                                                                                                                                                                                           |

**Supplemental Table S2 Legend:**

8-OH-dG=8-hydroxy-2'-deoxyguanosine (marker of oxidative damage to DNA), AGA=average for gestational age, CS= citrate synthase, DCF-DA =2',7'-dichlorofluorescein diacetate (marker of ROS), DMR= differentially methylated regions, ETC= electron transport chain, GDM= gestational diabetes exposure, GW=gestation week, IUGR= intra-uterine growth restriction, IVF/ICSI= in-vitro fertilization/intracytoplasmic sperm injection, LCAC= long-chain acylcarnitines, LCOH= long-chain hydroxy acylcarnitine species, LGA=large for gestational age, MDA= malondialdehyde (marker of lipid peroxidation/oxidative stress), mtDNAcn= mitochondrial DNA copy number, OXPHOS= oxidative phosphorylation, PC=post-conception, PE= preeclampsia, PND=post-natal day, RBC= red blood cell, ROS= reactive oxygen species, SGA=small for gestational age
